# Supplementary material for: Multi-Armed Star-Shaped Block Copolymers of Poly(ethylene glycol)-Poly(furfuryl glycidol) as Long Circulating Nanocarriers
Source: MDPI journal article supplement (doi:10.3390/polym15122626), 2023-06-09
Supplement: s1 [file s1]

## **Multi-Armed Star Block Copolymers of Poly(ethylene glycol)-Poly(Furfuryl Glycidol) as Long Circulating Nanocarriers**

Yasuhiro Nakagawa<sup>1,2</sup>, Kotaro Ushidome<sup>1</sup>, Keita Masuda<sup>1</sup>, Kazunori Igarashi<sup>3</sup>, Yu Matsumoto<sup>3</sup>  
Tatsuya Yamasoba<sup>3</sup>, Yasutaka Anraku<sup>1</sup>, Madoka Takai<sup>1</sup>, and Horacio Cabral<sup>1\*</sup>

1. Graduate School of Engineering, The University of Tokyo, 7-3-1 Hongo, Bunkyo-ku, Tokyo 113-8656, Japan.
2. School of Materials and Chemical Technology, Tokyo Institute of Technology, 2-12-1 Ookayama, Meguro-ku, Tokyo, Japan.
3. Department of Otorhinolaryngology and Head and Neck Surgery, Graduate School of Medicine and Faculty of Medicine, The University of Tokyo, 7-3-1 Hongo, Bunkyo-ku, Tokyo, Japan.

\*Corresponding author

horacio@bmw.t.u-tokyo.ac.jp; Tel.: +81-3-5841-7138

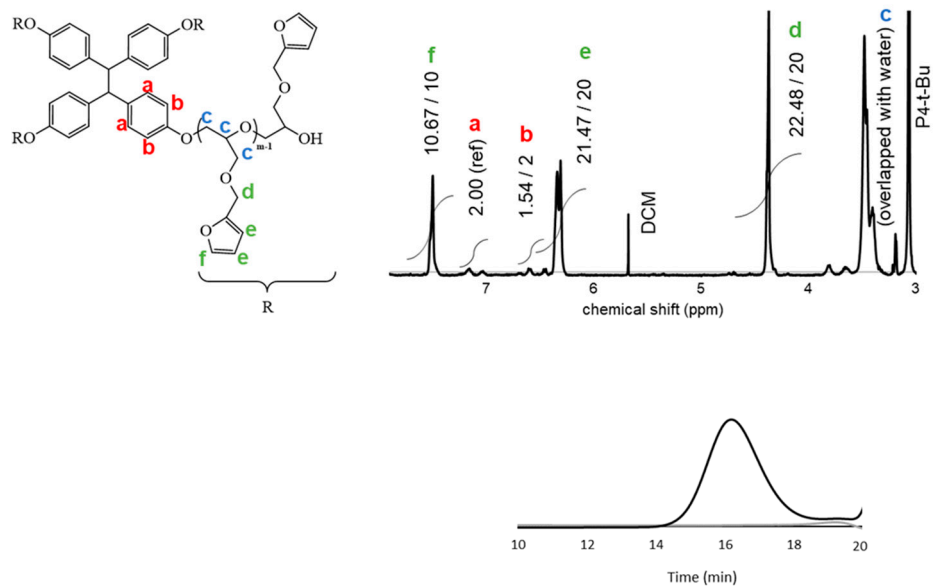

**Figure S1.**  $^1\text{H}$ -NMR spectrum (Solvent;  $\text{CDCl}_3$ ) and GPC curve of TTP-PFG10

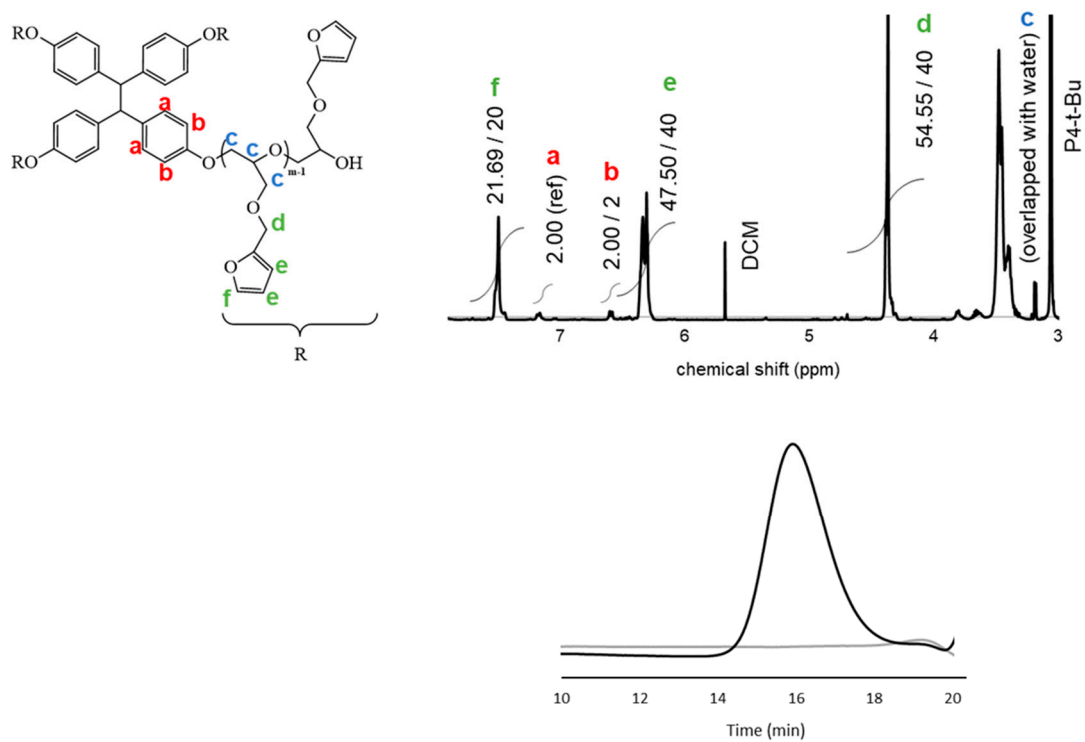

**Figure S2.**  $^1\text{H}$ -NMR spectrum (Solvent;  $\text{CDCl}_3$ ) and GPC curve of TTP-PFG20

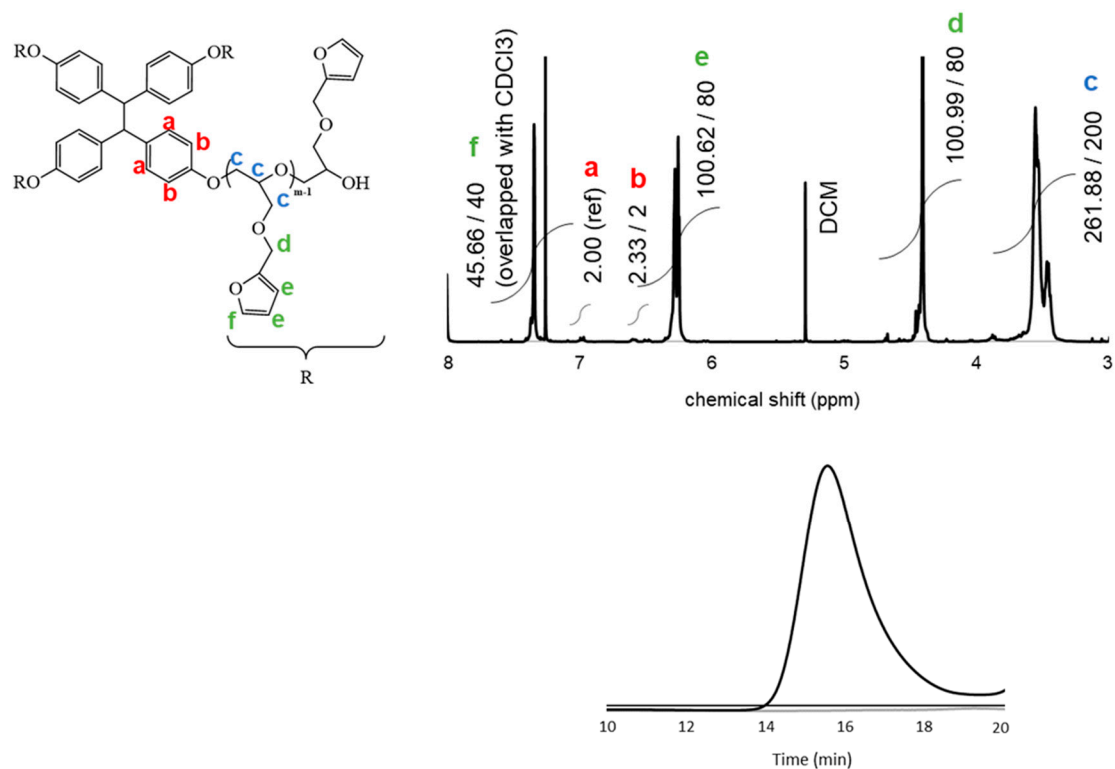

**Figure S3.**  $^1\text{H}$ -NMR spectrum (Solvent;  $\text{CDCl}_3$ ) and GPC curve of TTP-PFG50

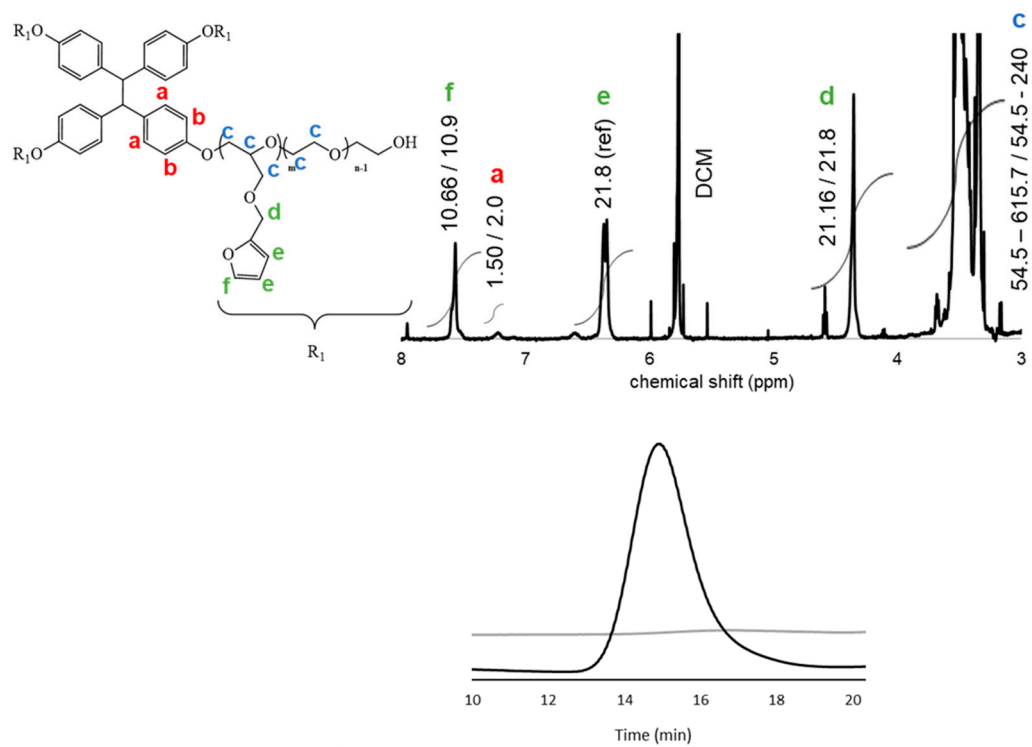

**Figure S4.**  $^1\text{H}$ -NMR spectrum (Solvent;  $\text{DMSO}-d_6$ ) and GPC curve of TTP-PFG10-PEG150

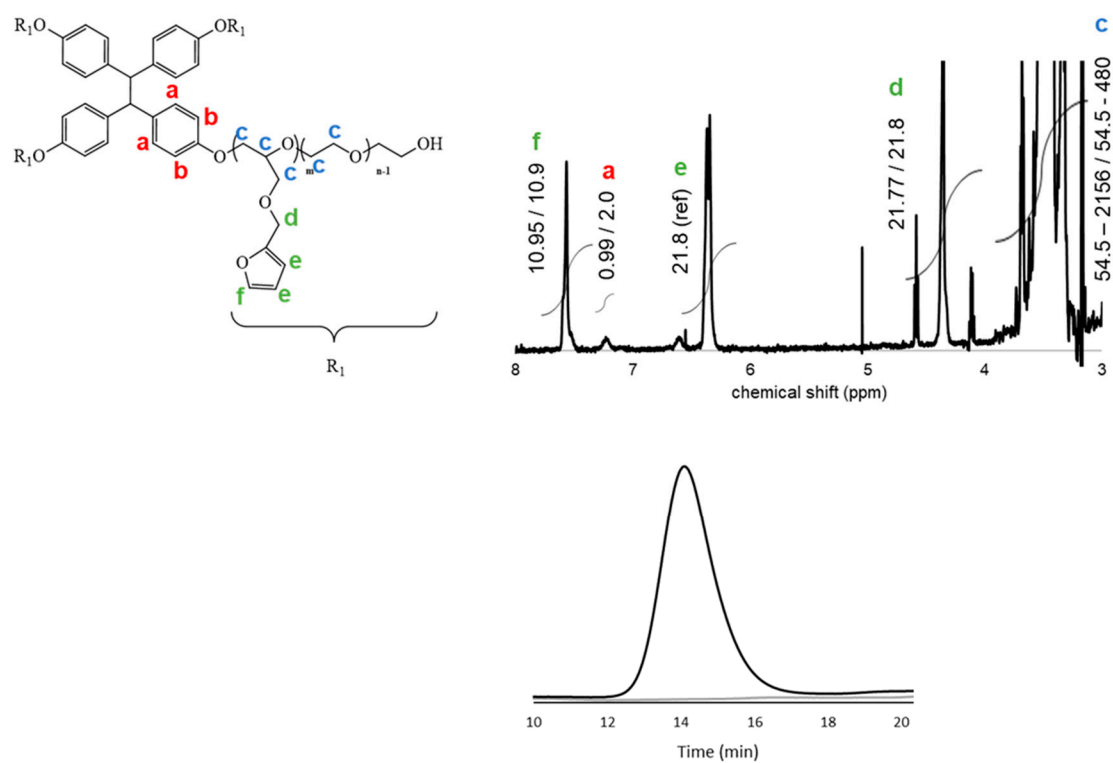

**Figure S5.**  $^1\text{H}$ -NMR spectrum (Solvent; DMSO- $d_6$ ) and GPC curve of TTP-PFG10-PEG500

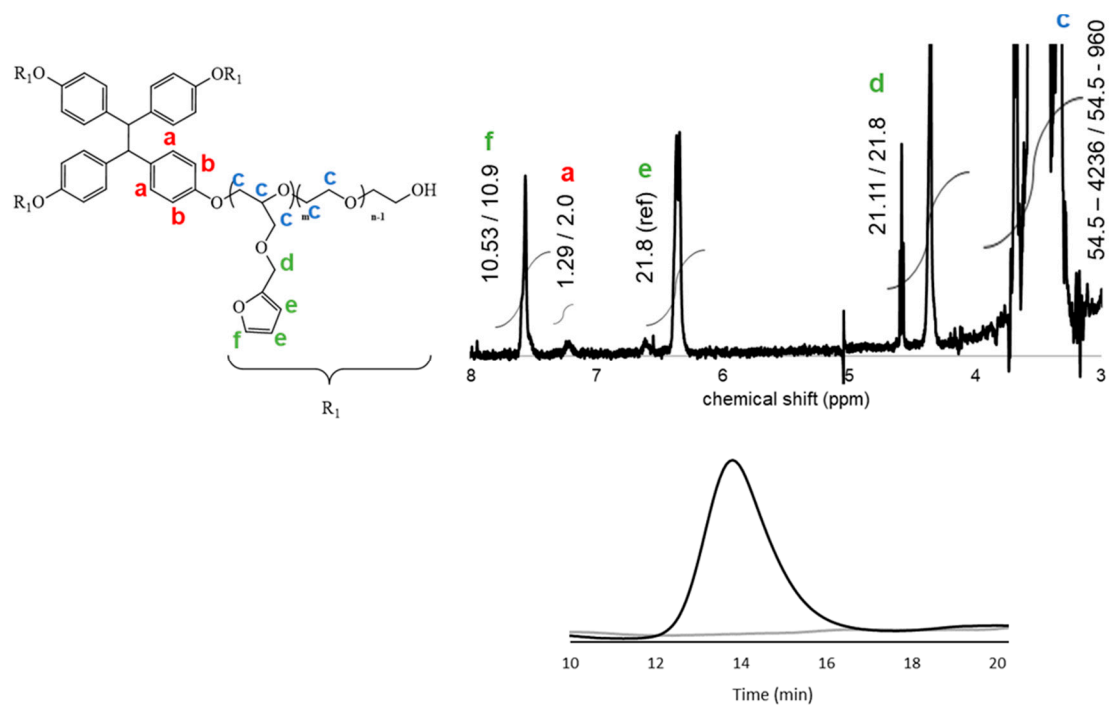

**Figure S6.**  $^1\text{H}$ -NMR spectrum (Solvent; DMSO- $d_6$ ) and GPC curve of TTP-PFG10-PEG1000

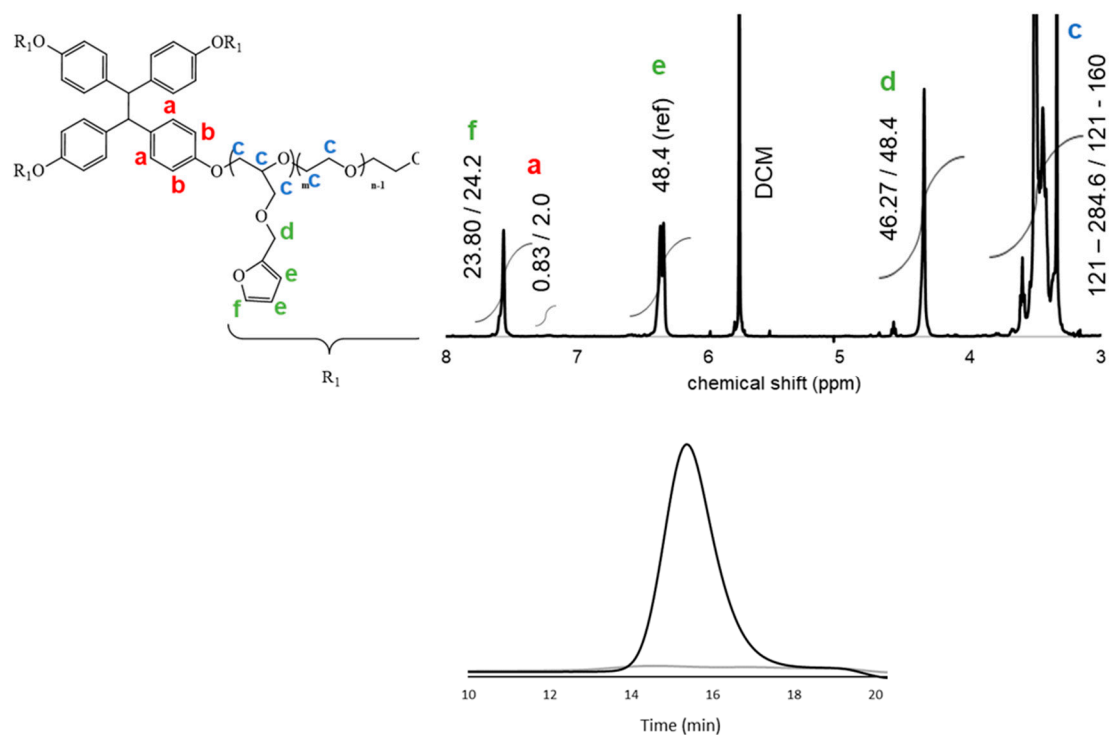

**Figure S7.**  $^1\text{H}$ -NMR spectrum (Solvent; DMSO- $d_6$ ) and GPC curve of TTP-PFG20-PEG70

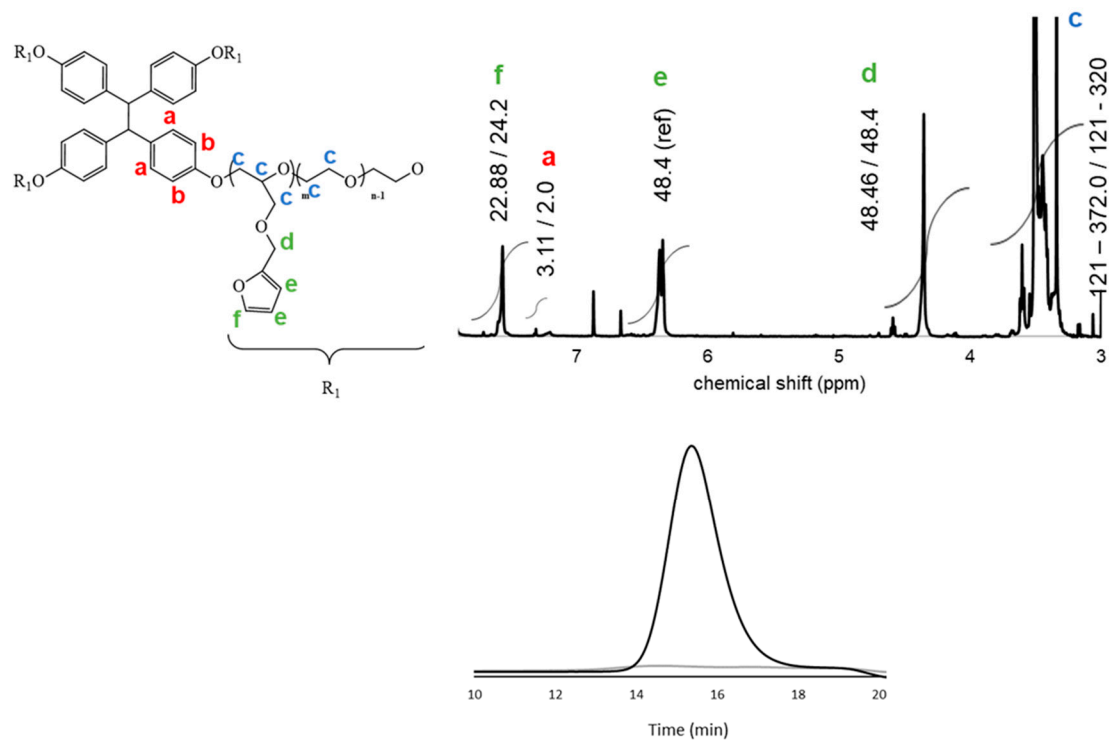

**Figure S8.**  $^1\text{H}$ -NMR spectrum (Solvent; DMSO- $d_6$ ) and GPC curve of TTP-PFG20-PEG90

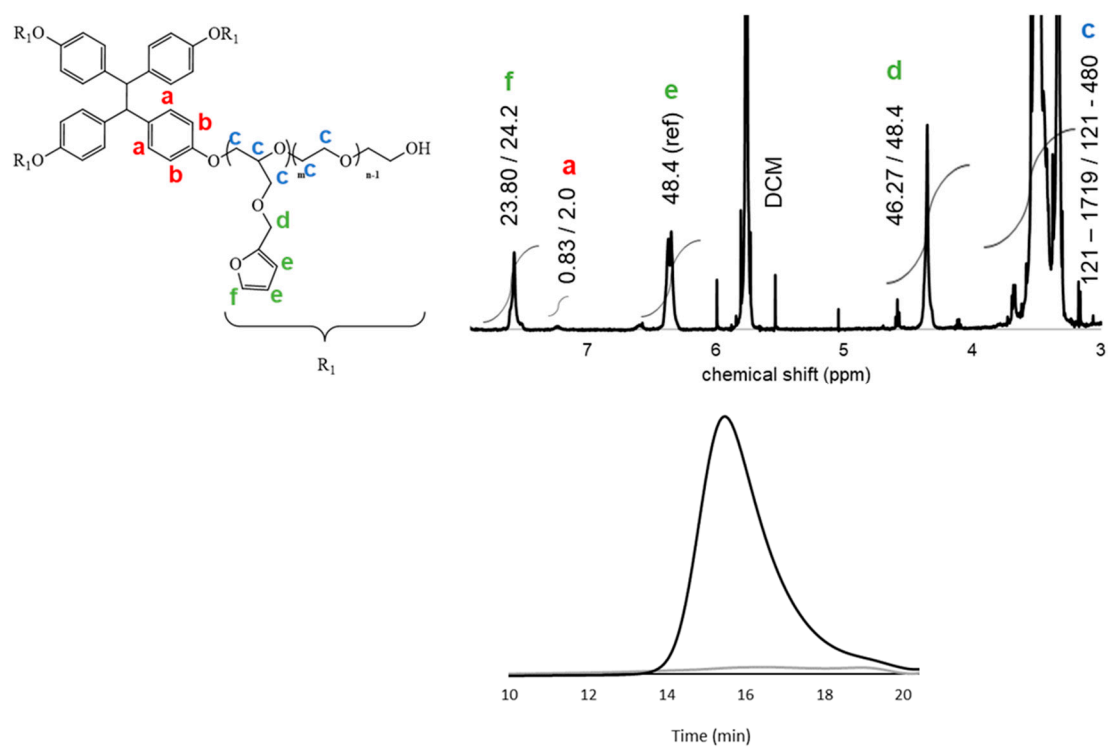

**Figure S9.**  $^1\text{H}$ -NMR spectrum (Solvent; DMSO- $d_6$ ) and GPC curve of TTP-PFG20-PEG430

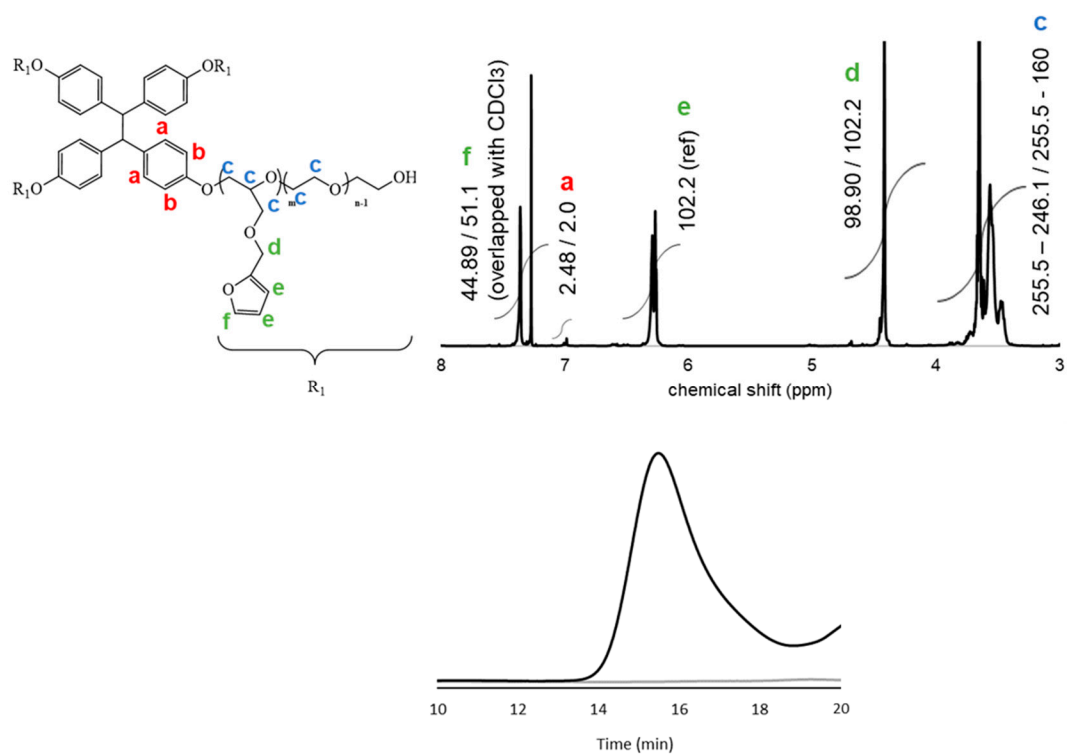

**Figure S10.**  $^1\text{H}$ -NMR spectrum (Solvent; DMSO- $d_6$ ) and GPC curve of TTP-PFG50-PEG60

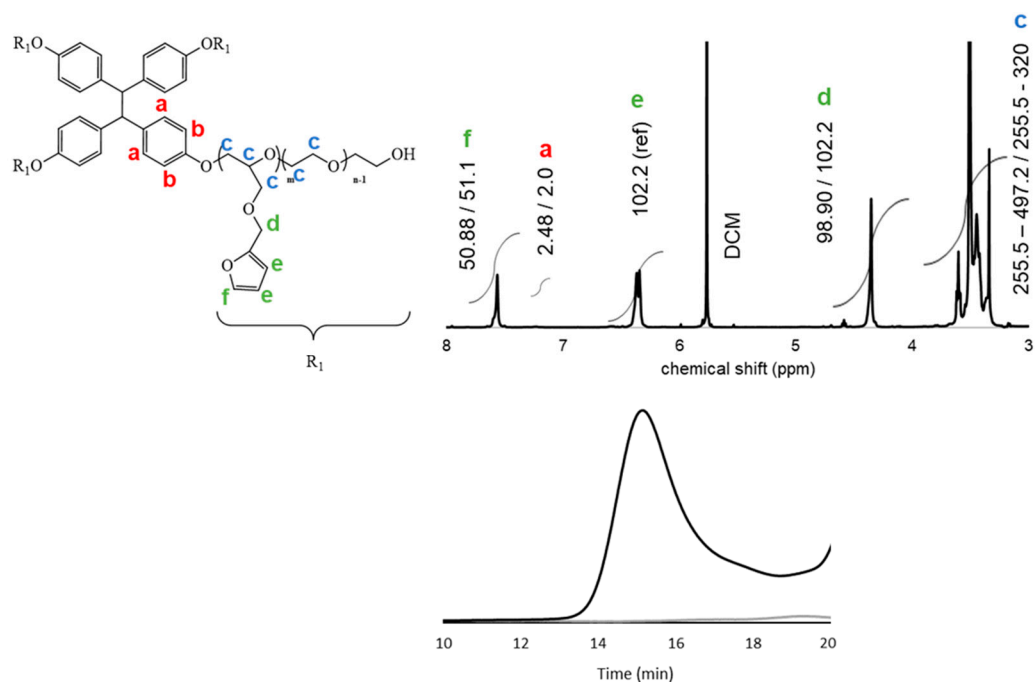

**Figure S11.**  $^1\text{H}$ -NMR spectrum (Solvent; DMSO- $d_6$ ) and GPC curve of TTP-PFG50-PEG150

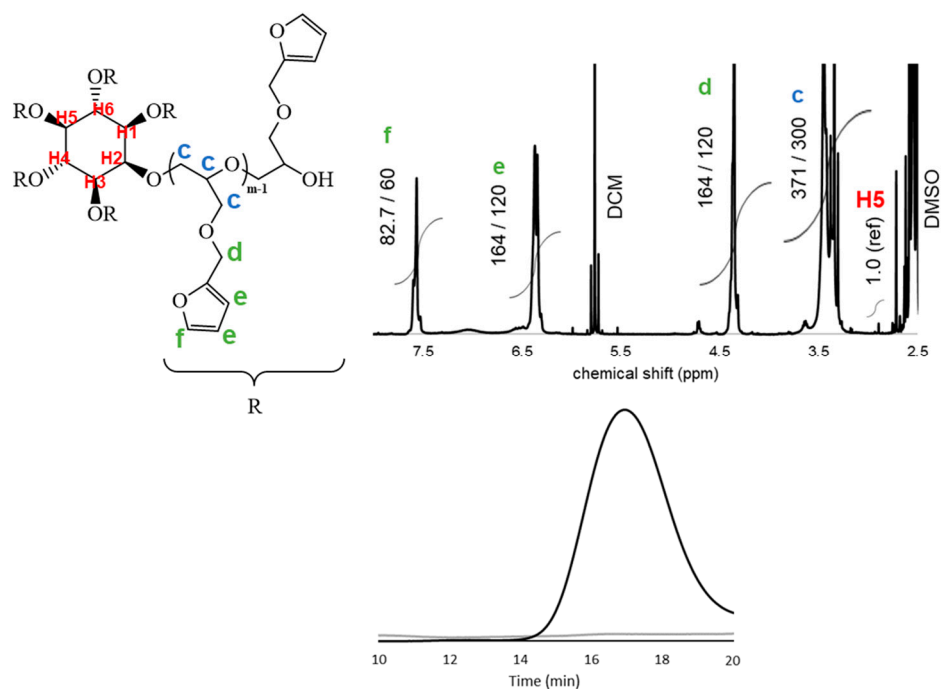

**Figure S12.**  $^1\text{H}$ -NMR spectrum (Solvent; DMSO- $d_6$ ) and GPC curve of INO-PFG10

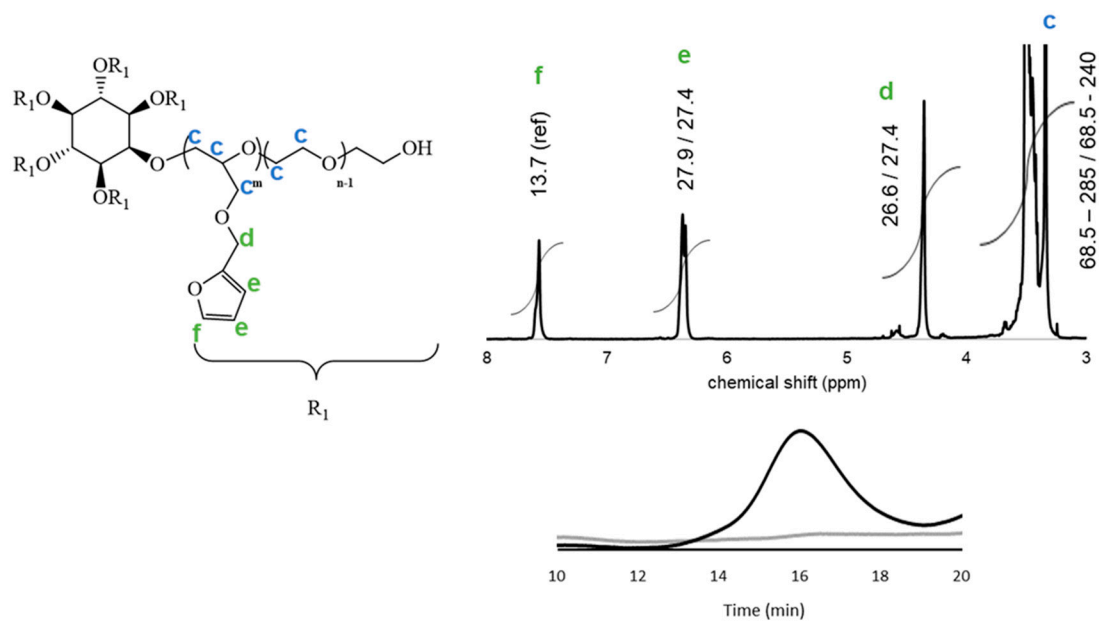

**Figure S13.**  $^1\text{H}$ -NMR spectrum (Solvent; DMSO- $d_6$ ) and GPC curve of INO-PFG10-PEG60

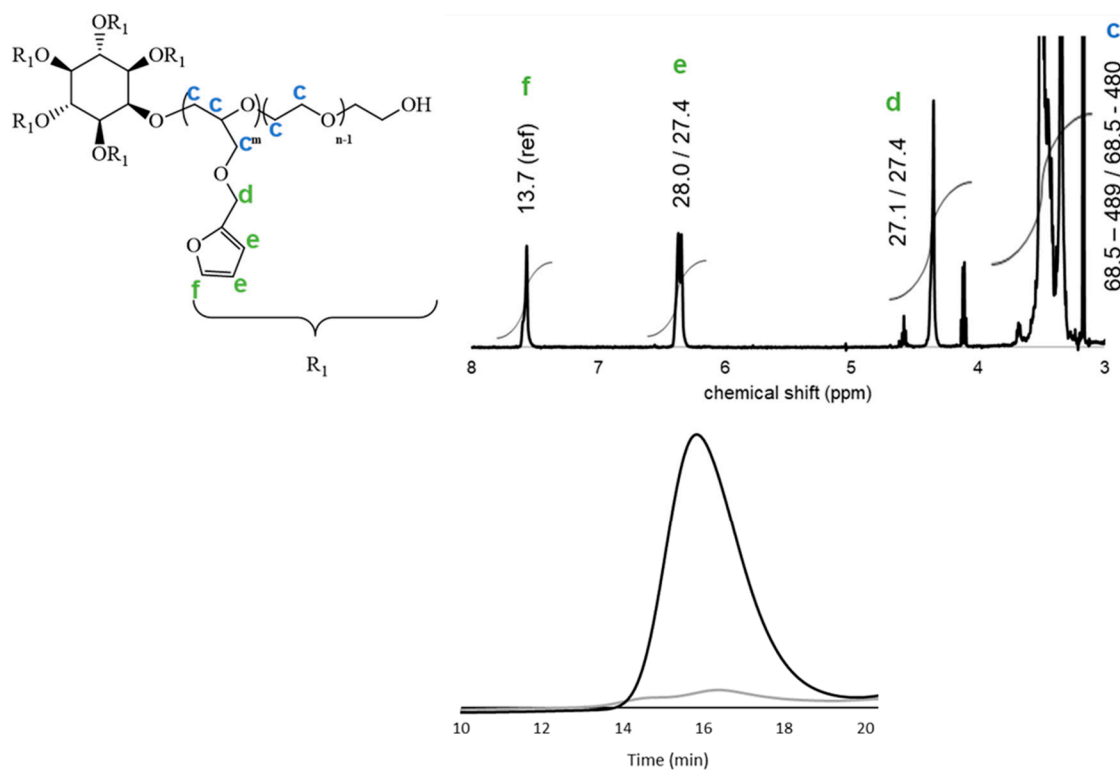

**Figure S14.**  $^1\text{H}$ -NMR spectrum (Solvent; DMSO- $d_6$ ) and GPC curve of INO-PFG10-PEG120
